# Supplementary material for: Initial excited-state relaxation of the bilin chromophores of phytochromes: a computational study
Source: Royal Society of Chemistry journal article supplement (doi:10.1039/c0pp00307g), 2011-01-21
Supplement: c0pp00307g.pdf [file c0pp00307g.pdf]

Supplementary information for

**Initial excited-state relaxation of the bilin chromophores of phytochromes: a computational study**

**Angela Strambi<sup>a</sup> and Bo Durbeej**

*Division of Computational Physics, IFM, Linköping University, SE-581 83 Linköping, Sweden*  
*E-mail: bodur@ifm.liu.se; Fax: +46-(0)13-13 75 68; Tel: +46-(0)13-28 24 97*

<sup>a</sup> Current address: Istituto Toscano Tumori, Via Fiorentina 1, I-53100 Siena, Italy

## Contents

|    |                                               |         |
|----|-----------------------------------------------|---------|
| 1. | Figure S1                                     | page S3 |
| 2. | Table S1                                      | page S4 |
| 3. | Table S2                                      | page S5 |
| 4. | Cartesian coordinates of optimized structures | page S6 |

## 1. Figure S1

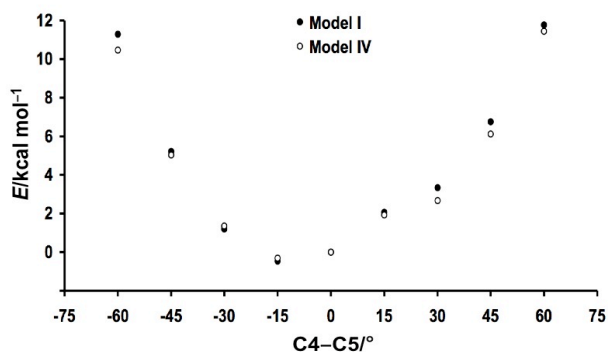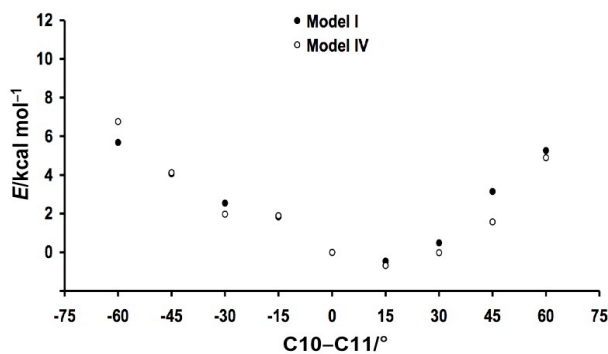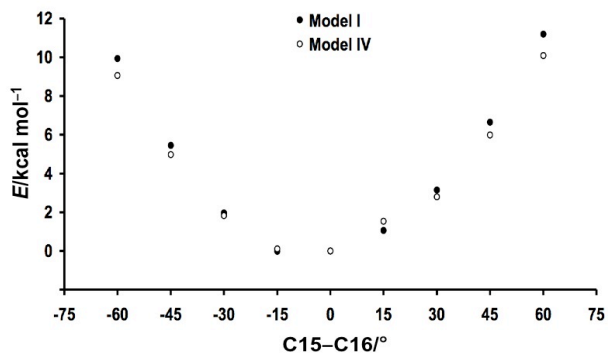

$S_1$  potential energy curves for up to  $\pm 60^\circ$  torsional motion around the C4–C5, C10–C11 and C15–C16 bonds of two models (I and IV) of *ZsZsZa* BV computed at the TD-B3LYP/SVP//B3LYP/SVP level of theory. For each bond and model, energies ( $E$ ) are given relative the structure at which the corresponding dihedral angle is  $0^\circ$ .

## 2. Table S1

**Table S1** Calculated absorption maxima for different models of *ZsZsZa* BV and *ZsZsEa* BV<sup>a</sup>

|                  | eV   | nm  |
|------------------|------|-----|
| <i>ZsZsZa</i> BV |      |     |
| Model I          | 1.87 | 663 |
| Model II         | 1.83 | 678 |
| Model III        | 1.86 | 667 |
| Model IV         | 1.85 | 670 |
| <i>ZsZsEa</i> BV |      |     |
| Model I          | 1.87 | 663 |
| Model II         | 1.78 | 697 |
| Model III        | 1.87 | 663 |
| Model IV         | 1.77 | 700 |

<sup>a</sup> All calculations performed at the B3LYP/SVP level of theory and using the PCM with the dielectric constant set to 4.

### 3. Table S2

**Table S2** Effect of computational model on absolute differences in B3LYP/SVP ground-state and CIS/SVP excited-state bond lengths (Å) and dihedral angles (°) of *ZsZsZa* BV and *ZsZsEa* BV

|                  | AB bridge |       |      |       | BC bridge |       |       |       | CD bridge |       |       |       |
|------------------|-----------|-------|------|-------|-----------|-------|-------|-------|-----------|-------|-------|-------|
|                  | 4-5       |       | 5-6  |       | 9-10      |       | 10-11 |       | 14-15     |       | 15-16 |       |
|                  | Bond      | Angle | Bond | Angle | Bond      | Angle | Bond  | Angle | Bond      | Angle | Bond  | Angle |
| <i>ZsZsZa</i> BV |           |       |      |       |           |       |       |       |           |       |       |       |
| Model I          | 0.00      | 0.7   | 0.02 | 2.3   | 0.01      | 0.4   | 0.01  | 4.2   | 0.01      | 0.4   | 0.01  | 0.5   |
| Model II         | 0.00      | 1.0   | 0.02 | 2.7   | 0.01      | 0.1   | 0.00  | 3.5   | 0.01      | 3.9   | 0.01  | 1.4   |
| Model III        | 0.01      | 0.7   | 0.02 | 2.3   | 0.01      | 1.3   | 0.01  | 4.2   | 0.01      | 0.5   | 0.01  | 0.5   |
| Model IV         | 0.00      | 0.8   | 0.02 | 2.4   | 0.01      | 0.1   | 0.00  | 3.5   | 0.01      | 2.0   | 0.01  | 0.9   |
| <i>ZsZsEa</i> BV |           |       |      |       |           |       |       |       |           |       |       |       |
| Model I          | 0.00      | 0.9   | 0.02 | 3.4   | 0.01      | 1.1   | 0.01  | 5.6   | 0.01      | 3.0   | 0.01  | 1.8   |
| Model II         | 0.00      | 0.7   | 0.01 | 0.9   | 0.01      | 1.1   | 0.00  | 2.5   | 0.01      | 1.7   | 0.01  | 0.2   |
| Model III        | 0.00      | 0.8   | 0.02 | 3.1   | 0.01      | 1.3   | 0.01  | 6.2   | 0.01      | 2.4   | 0.01  | 1.8   |
| Model IV         | 0.00      | 0.9   | 0.02 | 1.2   | 0.01      | 1.6   | 0.01  | 3.0   | 0.01      | 1.0   | 0.01  | 1.3   |

#### 4. Cartesian coordinates of optimized structures

B3LYP/SVP  $S_0$  structure of  $ZsZsZs$  DHBV

|   |           |           |           |
|---|-----------|-----------|-----------|
| N | 1.312827  | -1.314377 | 0.852528  |
| C | 1.461013  | -2.431155 | 0.068949  |
| C | 2.943542  | -2.745614 | -0.021205 |
| C | 3.630933  | -1.633321 | 0.791547  |
| C | 2.496010  | -0.786535 | 1.360812  |
| C | 0.431157  | -3.130026 | -0.489183 |
| C | -0.959446 | -2.764175 | -0.406706 |
| C | -2.065203 | -3.682846 | -0.667368 |
| C | -3.212147 | -2.984878 | -0.427615 |
| C | -2.803734 | -1.634633 | -0.073618 |
| N | -1.412477 | -1.553118 | -0.059053 |
| C | -3.650283 | -0.559191 | 0.121860  |
| C | -3.238699 | 0.795544  | 0.244419  |
| C | -3.978115 | 1.980081  | 0.459947  |
| C | -3.072793 | 3.045517  | 0.456338  |
| C | -1.778531 | 2.519971  | 0.222742  |
| N | -1.920169 | 1.163110  | 0.106940  |
| C | -0.548698 | 3.243127  | 0.103086  |
| C | 0.674737  | 2.804544  | -0.326286 |
| C | 1.905622  | 3.590476  | -0.312961 |
| C | 2.930964  | 2.825788  | -0.756673 |
| C | 2.401317  | 1.485547  | -1.104830 |
| N | 1.031749  | 1.554589  | -0.817890 |
| O | 2.973989  | 0.502211  | -1.540576 |
| H | 3.982722  | 3.086678  | -0.854316 |
| O | 2.565360  | 0.165352  | 2.099925  |
| H | -1.962254 | -4.724276 | -0.970618 |
| H | -4.241675 | -3.332580 | -0.509446 |
| H | -3.298634 | 4.102705  | 0.583065  |
| H | -5.056681 | 2.031586  | 0.596793  |
| H | 1.944740  | 4.620462  | 0.040898  |
| H | -1.222618 | 0.417947  | 0.021974  |
| H | -4.726044 | -0.749246 | 0.134971  |
| H | -0.599518 | 4.294792  | 0.393239  |
| H | 0.405771  | 0.805427  | -1.085229 |
| H | 0.674522  | -4.058504 | -1.010040 |
| H | 3.257071  | -2.741146 | -1.075790 |
| H | 3.145993  | -3.752908 | 0.376392  |
| H | 0.386181  | -0.946597 | 1.064306  |
| H | 4.257168  | -2.000342 | 1.618349  |
| H | 4.249070  | -0.975252 | 0.163451  |

### TD-B3LYP/SVP S<sub>1</sub> structure of ZsZsZs DHBV

|   |           |           |           |
|---|-----------|-----------|-----------|
| N | 0.000000  | 0.000000  | 0.000000  |
| C | 0.000000  | 0.000000  | 1.383764  |
| C | 1.389412  | 0.000000  | 1.786216  |
| C | 2.176851  | -0.041595 | 0.664100  |
| C | 1.310517  | -0.017230 | -0.514759 |
| C | -1.117636 | -0.065106 | 2.209414  |
| C | -2.453041 | -0.326479 | 1.819581  |
| C | -3.638558 | -0.252526 | 2.627689  |
| C | -4.723071 | -0.593305 | 1.842168  |
| C | -4.235934 | -0.898689 | 0.529608  |
| N | -2.862619 | -0.719633 | 0.571808  |
| C | -4.906482 | -1.268076 | -0.635743 |
| C | -4.298956 | -1.532760 | -1.888233 |
| C | -5.010515 | -1.677461 | -3.139960 |
| C | -4.052143 | -1.805894 | -4.116343 |
| C | -2.777419 | -1.780604 | -3.438411 |
| N | -2.942695 | -1.613789 | -2.093968 |
| C | -1.511076 | -1.925988 | -4.086825 |
| C | -0.299688 | -2.172529 | -3.471048 |
| N | -0.158704 | -2.435176 | -2.147060 |
| C | 1.143594  | -2.741283 | -1.737425 |
| C | 1.986988  | -2.785503 | -3.007376 |
| C | 1.079974  | -2.178468 | -4.093766 |
| O | 1.459744  | -2.963785 | -0.591631 |
| O | 1.560253  | -0.038266 | -1.717573 |
| H | 3.262017  | -0.093536 | 0.602182  |
| H | -4.197616 | -1.926452 | -5.189727 |
| H | -6.093741 | -1.653879 | -3.259653 |
| H | -3.647073 | 0.045709  | 3.674654  |
| H | -5.770313 | -0.625858 | 2.138694  |
| H | 1.711130  | -0.034853 | 2.826528  |
| H | -2.317313 | -0.981544 | -0.251339 |
| H | -5.996703 | -1.317864 | -0.585653 |
| H | -0.944819 | 0.065589  | 3.279500  |
| H | -0.789494 | 0.214739  | -0.597588 |
| H | -1.500612 | -1.840762 | -5.176475 |
| H | 1.366399  | -1.128784 | -4.280259 |
| H | 1.098602  | -2.711420 | -5.056267 |
| H | -0.965423 | -2.402120 | -1.520696 |
| H | 2.244755  | -3.840112 | -3.208584 |
| H | 2.920443  | -2.231359 | -2.847563 |

B3LYP/SVP S<sub>0</sub> structure of *ZsZsZa* BV

|   |           |           |           |
|---|-----------|-----------|-----------|
| C | -3.753204 | 1.137114  | -0.094592 |
| C | -3.057506 | -0.139515 | -0.025713 |
| N | -4.018908 | -1.118179 | 0.026693  |
| C | -5.315287 | -0.565924 | -0.033063 |
| C | -5.101980 | 0.930815  | -0.087899 |
| C | -1.683981 | -0.280087 | -0.015199 |
| C | -0.923493 | -1.469603 | 0.133322  |
| C | -1.264932 | -2.816562 | 0.481162  |
| C | -0.110323 | -3.574251 | 0.454622  |
| C | 0.986009  | -2.721703 | 0.119497  |
| N | 0.435269  | -1.451365 | -0.046303 |
| C | 2.335008  | -3.053836 | 0.017483  |
| C | 3.437404  | -2.191182 | -0.112607 |
| C | 4.789692  | -2.507039 | -0.401813 |
| C | 5.520244  | -1.320985 | -0.422755 |
| C | 4.631240  | -0.257285 | -0.138404 |
| N | 3.376919  | -0.805833 | 0.013159  |
| C | 4.894787  | 1.141317  | 0.035682  |
| C | 3.936179  | 2.119118  | 0.074949  |
| C | 4.086170  | 3.515254  | 0.483302  |
| C | 2.876364  | 4.122751  | 0.447111  |
| C | 1.867783  | 3.149380  | -0.046425 |
| N | 2.580842  | 1.932884  | -0.200190 |
| O | 0.690070  | 3.274903  | -0.290542 |
| O | -6.330138 | -1.214117 | -0.045349 |
| C | -6.154220 | 1.922616  | -0.126527 |
| C | -7.474960 | 1.652328  | -0.119167 |
| H | 6.582099  | -1.207800 | -0.631884 |
| H | 5.163667  | -3.509564 | -0.603262 |
| H | -2.250830 | -3.172267 | 0.768374  |
| H | -0.017270 | -4.632474 | 0.693954  |
| H | -3.233378 | 2.094247  | -0.127087 |
| H | 0.905379  | -0.678877 | -0.499218 |
| H | 2.655798  | -0.321542 | 0.539266  |
| H | 2.565972  | -4.121038 | 0.049828  |
| H | -1.121746 | 0.650807  | -0.134141 |
| H | -3.873008 | -2.117168 | -0.044137 |
| H | -5.815830 | 2.963599  | -0.164727 |
| H | -8.204934 | 2.464701  | -0.151716 |
| H | -7.849540 | 0.627535  | -0.082491 |
| H | 5.935997  | 1.437216  | 0.174380  |
| H | 5.033417  | 3.944000  | 0.810151  |
| H | 2.274537  | 1.286926  | -0.920587 |
| H | 2.625403  | 5.146547  | 0.719109  |



TD-B3LYP/SVP S<sub>1</sub> structure of ZsZsZa BV

|   |           |           |           |
|---|-----------|-----------|-----------|
| C | 0.011435  | 0.014710  | -0.000528 |
| C | 0.005881  | 0.008303  | 1.450868  |
| N | 1.334319  | 0.000791  | 1.845600  |
| C | 2.202293  | 0.040201  | 0.726396  |
| C | 1.303851  | 0.009000  | -0.442838 |
| C | -1.075930 | -0.050063 | 2.326696  |
| C | -0.968565 | -0.362829 | 3.699762  |
| C | -1.952212 | -0.300530 | 4.747256  |
| C | -1.384437 | -0.781944 | 5.904648  |
| C | -0.021368 | -1.162390 | 5.622787  |
| N | 0.186789  | -0.849988 | 4.272258  |
| C | 0.944917  | -1.720833 | 6.435612  |
| C | 2.303111  | -1.977302 | 6.041646  |
| C | 3.237403  | -2.907987 | 6.531174  |
| C | 4.396454  | -2.823748 | 5.733335  |
| C | 4.185355  | -1.827996 | 4.762375  |
| N | 2.904447  | -1.349407 | 4.962864  |
| C | 4.942564  | -1.323228 | 3.647474  |
| C | 6.274134  | -1.501995 | 3.359698  |
| N | 7.253129  | -2.128223 | 4.105962  |
| C | 8.495326  | -2.095805 | 3.458033  |
| C | 8.232936  | -1.391499 | 2.146442  |
| C | 6.902083  | -1.046637 | 2.133761  |
| C | 9.209811  | -1.135564 | 1.121578  |
| C | 10.519206 | -1.492341 | 1.189116  |
| O | 9.525041  | -2.544335 | 3.902628  |
| O | 3.415745  | 0.080399  | 0.828041  |
| H | -2.963007 | 0.083701  | 4.622318  |
| H | -1.852022 | -0.848849 | 6.885825  |
| H | 5.268299  | -3.469114 | 5.812933  |
| H | 3.059391  | -3.605697 | 7.347247  |
| H | 6.351483  | -0.537787 | 1.341374  |
| H | 2.600937  | -0.450915 | 4.608199  |
| H | 0.883696  | -1.335190 | 3.714497  |
| H | 0.645928  | -2.036892 | 7.436910  |
| H | 4.390871  | -0.740696 | 2.900676  |
| H | 7.159302  | -2.468346 | 5.055386  |
| H | 8.841860  | -0.610816 | 0.233115  |
| H | 11.197733 | -1.261092 | 0.364338  |
| H | 10.920029 | -2.011618 | 2.062312  |
| H | -2.074672 | 0.118844  | 1.921187  |
| H | -0.893556 | -0.024564 | -0.605998 |
| H | 1.638864  | 0.395567  | 2.727478  |
| H | 1.663001  | -0.024299 | -1.469815 |

B3LYP/SVP S<sub>0</sub> structure of *ZsZsEa* BV

|   |           |           |           |
|---|-----------|-----------|-----------|
| C | -4.062828 | -0.935712 | 0.053452  |
| C | -2.938665 | -0.017076 | -0.067452 |
| N | -3.469123 | 1.245665  | -0.184927 |
| C | -4.870383 | 1.228715  | -0.137386 |
| C | -5.233449 | -0.235207 | 0.014788  |
| C | -1.574665 | -0.237251 | -0.086880 |
| C | -0.866529 | -1.457005 | 0.067639  |
| C | -1.238501 | -2.809438 | 0.369664  |
| C | -0.094912 | -3.581143 | 0.365981  |
| C | 1.027889  | -2.737095 | 0.088842  |
| N | 0.495964  | -1.458341 | -0.069967 |
| C | 2.376462  | -3.071991 | 0.024601  |
| C | 3.474722  | -2.193536 | -0.073566 |
| C | 4.835975  | -2.469570 | -0.354194 |
| C | 5.534405  | -1.260522 | -0.362432 |
| C | 4.614051  | -0.225368 | -0.080591 |
| N | 3.377344  | -0.813475 | 0.063759  |
| C | 4.810524  | 1.186975  | 0.092680  |
| C | 3.800083  | 2.111706  | 0.097847  |
| N | 2.463495  | 1.842216  | -0.219682 |
| C | 1.671117  | 3.006842  | -0.072286 |
| C | 2.600595  | 4.039578  | 0.449826  |
| C | 3.847299  | 3.511253  | 0.514407  |
| O | 0.489187  | 3.053872  | -0.336500 |
| O | -5.577215 | 2.202053  | -0.208447 |
| C | -6.580065 | -0.756812 | 0.092215  |
| C | -7.701974 | -0.010638 | 0.046217  |
| H | -2.243362 | -3.158193 | 0.586337  |
| H | 6.593695  | -1.118025 | -0.566721 |
| H | 5.240548  | -3.458540 | -0.563233 |
| H | -0.026415 | -4.647219 | 0.577285  |
| H | -3.972747 | -2.015118 | 0.138763  |
| H | 0.993749  | -0.675815 | -0.471278 |
| H | 2.643171  | -0.351650 | 0.591315  |
| H | 2.610779  | -4.138420 | 0.054552  |
| H | 4.754388  | 3.999090  | 0.871147  |
| H | 2.232177  | 1.201797  | -0.972988 |
| H | 5.830907  | 1.535914  | 0.260559  |
| H | 2.277895  | 5.042815  | 0.722717  |
| H | -0.952335 | 0.653103  | -0.231890 |
| H | -2.934290 | 2.104422  | -0.272965 |
| H | -6.658511 | -1.844504 | 0.195940  |
| H | -7.662113 | 1.075523  | -0.056529 |
| H | -8.683986 | -0.485275 | 0.112052  |

TD-B3LYP/SVP S<sub>1</sub> structure of *ZsZsEa* BV

|   |           |           |           |
|---|-----------|-----------|-----------|
| C | 2.721453  | 3.736303  | 0.684938  |
| C | 3.053938  | 2.416653  | 0.185154  |
| N | 1.866199  | 1.867374  | -0.280292 |
| C | 0.791385  | 2.775190  | -0.132462 |
| C | 1.378984  | 3.949493  | 0.529344  |
| C | 4.273604  | 1.742363  | 0.215282  |
| C | 4.417140  | 0.347778  | 0.029901  |
| C | 5.594877  | -0.461934 | -0.117676 |
| C | 5.207624  | -1.783649 | -0.181757 |
| C | 3.772031  | -1.845375 | -0.076009 |
| N | 3.343722  | -0.516014 | 0.011526  |
| C | 2.906164  | -2.929283 | -0.038517 |
| C | 1.479305  | -2.814470 | -0.004726 |
| C | 0.482876  | -3.671226 | 0.519712  |
| C | -0.750764 | -3.007227 | 0.443384  |
| C | -0.534902 | -1.742591 | -0.151865 |
| N | 0.823717  | -1.665551 | -0.405501 |
| C | -1.306583 | -0.573241 | -0.423922 |
| C | -2.656439 | -0.317457 | -0.263360 |
| C | -3.766009 | -1.191107 | 0.048386  |
| C | -4.922801 | -0.450977 | 0.086752  |
| C | -4.540175 | 0.990287  | -0.197948 |
| N | -3.163646 | 0.956713  | -0.419615 |
| O | -5.235708 | 1.977922  | -0.230518 |
| C | -6.258292 | -0.928164 | 0.337610  |
| C | -7.365942 | -0.148415 | 0.367098  |
| O | -0.345784 | 2.521833  | -0.505822 |
| H | -1.697892 | -3.378559 | 0.826327  |
| H | 6.609245  | -0.072248 | -0.182527 |
| H | 5.854214  | -2.649666 | -0.314623 |
| H | 0.668261  | -4.646872 | 0.965241  |
| H | -3.685419 | -2.267075 | 0.189928  |
| H | 1.216326  | -1.012194 | -1.071703 |
| H | 2.460168  | -0.265349 | 0.445164  |
| H | 3.340183  | -3.928537 | 0.030547  |
| H | 3.442960  | 4.400983  | 1.159100  |
| H | 1.846498  | 1.185414  | -1.029679 |
| H | 5.171508  | 2.317736  | 0.446720  |
| H | 0.796779  | 4.817156  | 0.834584  |
| H | -0.730054 | 0.301214  | -0.745142 |
| H | -2.588549 | 1.788290  | -0.550942 |
| H | -6.354140 | -2.005148 | 0.514250  |
| H | -7.306212 | 0.928118  | 0.193739  |
| H | -8.346204 | -0.588283 | 0.566788  |

B3LYP/SVP S<sub>0</sub> structure of *ZaZsEa* BV

|   |           |           |           |
|---|-----------|-----------|-----------|
| N | 6.534599  | -0.534442 | -0.007782 |
| C | 5.381580  | -1.274234 | -0.040755 |
| C | 5.794166  | -2.684232 | -0.137670 |
| C | 7.140100  | -2.750788 | -0.162976 |
| C | 7.682734  | -1.361289 | -0.104041 |
| C | 4.075754  | -0.848499 | 0.005971  |
| C | 3.594969  | 0.484403  | 0.177864  |
| C | 4.241820  | 1.690884  | 0.566193  |
| C | 3.303589  | 2.711971  | 0.531667  |
| C | 2.051431  | 2.158204  | 0.153986  |
| N | 2.271843  | 0.793885  | -0.026316 |
| C | 0.832430  | 2.833136  | 0.011073  |
| C | -0.460655 | 2.330952  | -0.133367 |
| C | -1.634368 | 3.055793  | -0.488993 |
| C | -2.698009 | 2.174143  | -0.538742 |
| C | -2.217844 | 0.879045  | -0.178308 |
| N | -0.863883 | 1.004506  | 0.020435  |
| C | -2.856406 | -0.384000 | -0.024912 |
| C | -4.208507 | -0.657616 | -0.000266 |
| N | -4.703802 | -1.941048 | 0.077231  |
| C | -6.105529 | -1.962624 | 0.088945  |
| C | -6.512838 | -0.505754 | 0.038105  |
| C | -5.364720 | 0.230019  | -0.015570 |
| C | -7.875049 | -0.018883 | 0.061088  |
| C | -8.973779 | -0.797410 | 0.118819  |
| O | -6.780336 | -2.960787 | 0.133831  |
| O | 8.817147  | -0.961600 | -0.135636 |
| H | -3.713889 | 2.412491  | -0.837309 |
| H | 5.275468  | 1.786191  | 0.887898  |
| H | 3.463541  | 3.756632  | 0.793571  |
| H | -1.653969 | 4.118431  | -0.725916 |
| H | -5.308751 | 1.314871  | -0.026502 |
| H | -0.319027 | 0.301447  | 0.506570  |
| H | 1.643028  | 0.180262  | -0.531888 |
| H | 0.906404  | 3.923315  | 0.014800  |
| H | 5.082055  | -3.508479 | -0.164387 |
| H | 7.780950  | -3.628759 | -0.220473 |
| H | 6.606748  | 0.473408  | -0.067604 |
| H | 3.322673  | -1.632462 | -0.106272 |
| H | -2.186480 | -1.242210 | 0.088065  |
| H | -4.153161 | -2.792317 | 0.079057  |
| H | -7.985858 | 1.070410  | 0.026280  |
| H | -8.901222 | -1.886146 | 0.154367  |
| H | -9.969514 | -0.347617 | 0.130543  |

TD-B3LYP/SVP S<sub>1</sub> structure of *ZaZsEa* BV

|   |            |           |           |
|---|------------|-----------|-----------|
| N | 0.000000   | 0.000000  | 0.000000  |
| C | 0.000000   | 0.000000  | 1.389200  |
| C | 1.388910   | 0.000000  | 1.799454  |
| C | 2.196628   | -0.014177 | 0.682940  |
| C | 1.289523   | -0.026797 | -0.526330 |
| C | -1.139911  | 0.032954  | 2.160063  |
| C | -1.245031  | -0.073085 | 3.593590  |
| C | -0.402308  | -0.592882 | 4.585582  |
| C | -1.036184  | -0.413217 | 5.833474  |
| C | -2.276527  | 0.197339  | 5.602876  |
| N | -2.397497  | 0.363128  | 4.234483  |
| C | -3.282149  | 0.605027  | 6.554366  |
| C | -4.629133  | 0.752729  | 6.322709  |
| C | -5.634299  | 1.288939  | 7.210852  |
| C | -6.846778  | 1.249865  | 6.572501  |
| C | -6.660323  | 0.663911  | 5.266544  |
| N | -5.308067  | 0.420855  | 5.142837  |
| C | -7.562182  | 0.368687  | 4.228385  |
| C | -8.953814  | 0.420077  | 4.242661  |
| C | -9.800205  | 0.183561  | 3.073110  |
| C | -11.101013 | 0.312074  | 3.432591  |
| C | -11.157085 | 0.625305  | 4.883678  |
| N | -9.790952  | 0.691768  | 5.286015  |
| O | -12.092597 | 0.790904  | 5.625700  |
| C | 3.633830   | 0.000662  | 0.652631  |
| C | 4.384895   | -0.012151 | -0.481954 |
| O | 1.573000   | -0.047649 | -1.702532 |
| H | 0.544284   | -1.099513 | 4.416940  |
| H | -7.782879  | 1.640907  | 6.963252  |
| H | -5.424708  | 1.691590  | 8.200769  |
| H | -0.662565  | -0.725953 | 6.806466  |
| H | 1.724263   | 0.046403  | 2.833301  |
| H | -3.063178  | 0.999114  | 3.807032  |
| H | -4.925173  | -0.205949 | 4.443317  |
| H | -2.936569  | 0.796044  | 7.572610  |
| H | -9.398607  | -0.041559 | 2.085262  |
| H | -9.536984  | 0.784206  | 6.261821  |
| H | -7.126578  | 0.043316  | 3.279705  |
| H | -11.992852 | 0.212278  | 2.816482  |
| H | -2.087974  | 0.148112  | 1.622098  |
| H | -0.821562  | -0.030830 | -0.593361 |
| H | 4.135200   | 0.021602  | 1.626635  |
| H | 3.915981   | -0.035080 | -1.468391 |
| H | 5.476215   | 0.000632  | -0.422556 |

### B3LYP/SVP S<sub>0</sub> structure of ZsZsZa PCB

|   |           |           |           |
|---|-----------|-----------|-----------|
| C | 3.757293  | 1.095392  | -0.054160 |
| C | 3.061687  | -0.195283 | -0.104597 |
| N | 4.029662  | -1.162308 | -0.198921 |
| C | 5.320163  | -0.588467 | -0.190556 |
| C | 5.095186  | 0.897866  | -0.115536 |
| C | 1.694223  | -0.344449 | -0.067260 |
| C | 0.937671  | -1.545083 | -0.195593 |
| C | 1.275709  | -2.874705 | -0.586779 |
| C | 0.132384  | -3.654302 | -0.501980 |
| C | -0.948769 | -2.826077 | -0.091095 |
| N | -0.411129 | -1.546863 | 0.059552  |
| C | -2.293337 | -3.168163 | 0.081665  |
| C | -3.391822 | -2.314483 | 0.229903  |
| C | -4.727711 | -2.631342 | 0.585440  |
| C | -5.472599 | -1.456955 | 0.587479  |
| C | -4.615822 | -0.390822 | 0.218414  |
| N | -3.354041 | -0.923903 | 0.045948  |
| C | -4.942479 | 0.989462  | 0.008986  |
| C | -4.055541 | 2.026764  | -0.063543 |
| C | -4.357098 | 3.476505  | -0.399462 |
| C | -2.974239 | 4.145551  | -0.551771 |
| C | -1.971652 | 3.112693  | -0.054226 |
| N | -2.700852 | 1.936553  | 0.168346  |
| O | -0.783215 | 3.201596  | 0.120100  |
| O | 6.351998  | -1.209033 | -0.233354 |
| C | 6.226710  | 1.870887  | -0.103433 |
| C | 7.059565  | 1.817134  | 1.190986  |
| H | -6.525801 | -1.347970 | 0.838135  |
| H | -5.078505 | -3.628656 | 0.846597  |
| H | 2.246549  | -3.208353 | -0.943688 |
| H | 0.041212  | -4.708948 | -0.757250 |
| H | 3.227952  | 2.046619  | 0.001846  |
| H | -0.852727 | -0.818710 | 0.606753  |
| H | -2.687211 | -0.499815 | -0.592233 |
| H | -2.516040 | -4.237771 | 0.088017  |
| H | 1.127395  | 0.580615  | 0.072807  |
| H | 3.894936  | -2.163440 | -0.136863 |
| H | -6.003198 | 1.224274  | -0.094428 |
| H | -4.937044 | 3.925487  | 0.424243  |
| H | -4.980508 | 3.550635  | -1.302058 |
| H | -2.264810 | 1.151067  | 0.637233  |
| H | -2.730286 | 4.390823  | -1.598109 |
| H | -2.856918 | 5.073800  | 0.025537  |
| H | 7.885608  | 2.542016  | 1.137426  |
| H | 6.445491  | 2.065380  | 2.070680  |
| H | 7.493919  | 0.817678  | 1.340142  |
| H | 5.831517  | 2.886496  | -0.261672 |
| H | 6.885597  | 1.641183  | -0.958862 |

TD-B3LYP/SVP S<sub>1</sub> structure of ZsZsZa PCB

|   |           |           |           |
|---|-----------|-----------|-----------|
| C | 0.000000  | 0.000000  | 0.000000  |
| C | 0.000000  | 0.000000  | 1.516517  |
| N | 1.308394  | 0.000000  | 1.924437  |
| C | 2.264599  | -0.059085 | 0.905784  |
| C | 1.487086  | -0.138741 | -0.401114 |
| C | -1.093971 | 0.024353  | 2.361600  |
| C | -1.055183 | -0.077753 | 3.775727  |
| C | -2.071928 | 0.224093  | 4.734506  |
| C | -1.574490 | -0.024527 | 5.999402  |
| C | -0.221710 | -0.500020 | 5.869885  |
| N | 0.065822  | -0.480233 | 4.489958  |
| C | 0.683692  | -0.917094 | 6.827641  |
| C | 2.051566  | -1.285268 | 6.547821  |
| C | 2.908320  | -2.188563 | 7.202662  |
| C | 4.132501  | -2.210924 | 6.505769  |
| C | 4.038836  | -1.314818 | 5.422139  |
| N | 2.752068  | -0.788540 | 5.459814  |
| C | 4.911693  | -0.963983 | 4.344239  |
| C | 6.269096  | -1.206285 | 4.227974  |
| N | 7.114806  | -1.745385 | 5.163856  |
| C | 8.436734  | -1.808294 | 4.670071  |
| C | 8.361405  | -1.284775 | 3.257429  |
| C | 7.063446  | -0.927443 | 3.042606  |
| C | 9.509832  | -1.184727 | 2.296062  |
| C | 10.884899 | -1.646569 | 2.784753  |
| O | 9.380233  | -2.202726 | 5.311844  |
| O | 3.455445  | -0.052330 | 1.112172  |
| H | -3.055859 | 0.619030  | 4.484692  |
| H | -2.084626 | 0.133489  | 6.948468  |
| H | 4.970256  | -2.871624 | 6.718538  |
| H | 2.639751  | -2.794093 | 8.066410  |
| H | 6.630515  | -0.513142 | 2.130842  |
| H | 2.516273  | 0.098735  | 5.027437  |
| H | 0.703297  | -1.179189 | 4.115749  |
| H | 0.329768  | -1.023368 | 7.854860  |
| H | 4.459583  | -0.463854 | 3.480372  |
| H | 6.900589  | -1.931824 | 6.136696  |
| H | -2.076907 | 0.154114  | 1.903620  |
| H | -0.441824 | 0.941109  | -0.370493 |
| H | -0.630996 | -0.813673 | -0.390662 |
| H | 1.593978  | 0.138887  | 2.887234  |
| H | 1.714776  | -1.100786 | -0.888261 |
| H | 1.841132  | 0.649676  | -1.082194 |
| H | 11.621683 | -1.516111 | 1.977718  |
| H | 11.225064 | -1.070126 | 3.657035  |
| H | 10.881412 | -2.706719 | 3.077087  |
| H | 9.229905  | -1.749504 | 1.386425  |
| H | 9.568573  | -0.132493 | 1.958167  |

### B3LYP/SVP S<sub>0</sub> structure of *ZsZsEa* PCB

|   |           |           |           |
|---|-----------|-----------|-----------|
| C | 4.129706  | -0.754067 | -0.228267 |
| C | 2.966123  | 0.126943  | -0.067499 |
| N | 3.458208  | 1.404265  | 0.054759  |
| C | 4.859185  | 1.426807  | -0.037032 |
| C | 5.264043  | -0.014746 | -0.212853 |
| C | 1.619311  | -0.154840 | -0.018302 |
| C | 0.966482  | -1.409621 | -0.190910 |
| C | 1.391417  | -2.710032 | -0.600582 |
| C | 0.297058  | -3.557562 | -0.552724 |
| C | -0.842719 | -2.805402 | -0.147288 |
| N | -0.383277 | -1.500968 | 0.040294  |
| C | -2.168731 | -3.220810 | -0.010454 |
| C | -3.308351 | -2.419164 | 0.143328  |
| C | -4.633848 | -2.792663 | 0.475868  |
| C | -5.421650 | -1.644014 | 0.501372  |
| C | -4.600858 | -0.539924 | 0.171226  |
| N | -3.319716 | -1.024640 | -0.004220 |
| C | -4.961519 | 0.839422  | -0.002056 |
| C | -4.095897 | 1.895489  | -0.018867 |
| N | -2.743458 | 1.817971  | 0.245226  |
| C | -2.023156 | 3.000766  | 0.054403  |
| C | -3.026613 | 4.033915  | -0.441133 |
| C | -4.406782 | 3.351212  | -0.318318 |
| O | -0.835845 | 3.096944  | 0.245121  |
| O | 5.551476  | 2.412310  | 0.016267  |
| C | 6.694142  | -0.426059 | -0.313999 |
| C | 7.472410  | -0.240729 | 1.002262  |
| H | 2.391638  | -2.977930 | -0.926523 |
| H | -6.480206 | -1.580645 | 0.745131  |
| H | -4.951946 | -3.807824 | 0.708537  |
| H | 0.276435  | -4.611041 | -0.827691 |
| H | 4.070866  | -1.835430 | -0.320444 |
| H | -0.879442 | -0.811880 | 0.590499  |
| H | -2.665328 | -0.560673 | -0.627326 |
| H | -2.339802 | -4.299454 | -0.038828 |
| H | -4.993896 | 3.774559  | 0.513962  |
| H | -2.924922 | 4.954713  | 0.150877  |
| H | -5.024267 | 3.447130  | -1.222727 |
| H | -2.312897 | 1.027463  | 0.710335  |
| H | -6.024756 | 1.052486  | -0.124848 |
| H | -2.770351 | 4.296272  | -1.480472 |
| H | 0.956763  | 0.698158  | 0.166556  |
| H | 2.899749  | 2.245358  | 0.157677  |
| H | 8.522033  | -0.540172 | 0.863824  |
| H | 7.459000  | 0.811077  | 1.323575  |
| H | 7.045956  | -0.857607 | 1.808573  |
| H | 7.170806  | 0.189945  | -1.096374 |
| H | 6.748691  | -1.474459 | -0.646889 |



TD-B3LYP/SVP S<sub>1</sub> structure of *ZsZsEa* PCB

|   |           |           |           |
|---|-----------|-----------|-----------|
| C | 0.000000  | 0.000000  | 0.000000  |
| C | 0.000000  | 0.000000  | 1.517151  |
| N | 1.313566  | 0.000000  | 1.920002  |
| C | 2.262851  | -0.104464 | 0.902526  |
| C | 1.480148  | -0.208374 | -0.398964 |
| C | -1.085725 | 0.022234  | 2.368432  |
| C | -1.043680 | -0.091630 | 3.789795  |
| C | -2.037461 | 0.208525  | 4.754800  |
| C | -1.522291 | -0.070067 | 6.021193  |
| C | -0.196836 | -0.563677 | 5.863978  |
| N | 0.080014  | -0.523674 | 4.490445  |
| C | 0.727334  | -1.038280 | 6.816547  |
| C | 2.083303  | -1.321550 | 6.544940  |
| C | 3.037768  | -2.093636 | 7.270170  |
| C | 4.227579  | -2.112571 | 6.546970  |
| C | 4.049025  | -1.337904 | 5.364209  |
| N | 2.731273  | -0.898666 | 5.387705  |
| C | 4.844110  | -1.021832 | 4.235374  |
| C | 6.191718  | -1.263123 | 3.999947  |
| C | 7.246531  | -1.776573 | 4.866069  |
| C | 8.415155  | -1.826576 | 4.170698  |
| C | 8.130173  | -1.330516 | 2.778113  |
| N | 6.763142  | -0.996214 | 2.780888  |
| O | 8.874971  | -1.227609 | 1.833288  |
| C | 9.781760  | -2.242146 | 4.597689  |
| C | 10.775305 | -1.065718 | 4.684925  |
| O | 3.456617  | -0.121071 | 1.104977  |
| H | 5.122964  | -2.671926 | 6.806806  |
| H | -3.016438 | 0.627868  | 4.527293  |
| H | -2.020903 | 0.078764  | 6.977547  |
| H | 2.833103  | -2.618304 | 8.202093  |
| H | 7.103818  | -2.045575 | 5.910799  |
| H | 2.447007  | -0.049259 | 4.912064  |
| H | 0.708118  | -1.219974 | 4.096106  |
| H | 0.362007  | -1.227391 | 7.827175  |
| H | -0.388501 | 0.965898  | -0.367672 |
| H | 1.860409  | 0.534369  | -1.116099 |
| H | -0.670426 | -0.777459 | -0.396957 |
| H | 1.600801  | 0.164280  | 2.877978  |
| H | -2.071915 | 0.148001  | 1.916040  |
| H | 1.670152  | -1.199786 | -0.842645 |
| H | 4.309006  | -0.549494 | 3.402173  |
| H | 6.261297  | -0.668400 | 1.959312  |
| H | 11.768877 | -1.434528 | 4.982275  |
| H | 10.876698 | -0.562630 | 3.711692  |
| H | 10.449580 | -0.322928 | 5.430129  |
| H | 10.163459 | -2.970936 | 3.860444  |
| H | 9.717774  | -2.761468 | 5.567188  |

B3LYP/SVP S<sub>0</sub> structure of *ZaZsEa* PCB

|   |           |           |           |
|---|-----------|-----------|-----------|
| N | 6.506838  | -0.458766 | 0.039173  |
| C | 5.379700  | -1.222730 | -0.023052 |
| C | 5.810846  | -2.674715 | -0.161600 |
| C | 7.344402  | -2.653481 | -0.044180 |
| C | 7.722321  | -1.179243 | 0.000336  |
| C | 4.074104  | -0.803326 | 0.009744  |
| C | 3.582039  | 0.525483  | 0.189563  |
| C | 4.210112  | 1.737229  | 0.602367  |
| C | 3.265399  | 2.750168  | 0.556593  |
| C | 2.023962  | 2.190683  | 0.149931  |
| N | 2.262701  | 0.826902  | -0.037326 |
| C | 0.804959  | 2.853585  | -0.006955 |
| C | -0.482520 | 2.339886  | -0.189896 |
| C | -1.652718 | 3.052740  | -0.567626 |
| C | -2.705980 | 2.156659  | -0.652795 |
| C | -2.219522 | 0.867472  | -0.293157 |
| N | -0.872652 | 1.007321  | -0.058934 |
| C | -2.843744 | -0.410503 | -0.166659 |
| C | -4.187620 | -0.703342 | -0.158892 |
| N | -4.673780 | -1.990242 | -0.102310 |
| C | -6.077221 | -2.013593 | -0.110300 |
| C | -6.492371 | -0.566206 | -0.147211 |
| C | -5.361797 | 0.178708  | -0.176671 |
| C | -7.926107 | -0.154485 | -0.121309 |
| C | -8.619577 | -0.453796 | 1.220825  |
| O | -6.762802 | -3.005685 | -0.090951 |
| O | 8.803789  | -0.663064 | 0.008956  |
| H | -3.716759 | 2.385499  | -0.975324 |
| H | 5.234492  | 1.844638  | 0.949318  |
| H | 3.411882  | 3.793611  | 0.831126  |
| H | -1.680146 | 4.117170  | -0.795412 |
| H | -5.310688 | 1.264237  | -0.179312 |
| H | -0.332167 | 0.306834  | 0.435576  |
| H | 1.649930  | 0.212709  | -0.561243 |
| H | 0.866861  | 3.944303  | 0.017018  |
| H | 5.474174  | -3.062090 | -1.137019 |
| H | 7.866238  | -3.133971 | -0.884332 |
| H | 5.325323  | -3.292430 | 0.608635  |
| H | 6.525216  | 0.555883  | 0.036630  |
| H | 3.324278  | -1.587161 | -0.125635 |
| H | 7.714603  | -3.133492 | 0.875369  |
| H | -2.161038 | -1.259920 | -0.061738 |
| H | -4.116296 | -2.836857 | -0.107700 |
| H | -9.675541 | -0.148115 | 1.175172  |
| H | -8.586872 | -1.528980 | 1.449934  |
| H | -8.142051 | 0.094288  | 2.047965  |
| H | -8.000927 | 0.918082  | -0.360094 |
| H | -8.452156 | -0.703905 | -0.921521 |

TD-B3LYP/SVP S<sub>1</sub> structure of *ZaZsEa* PCB

|   |           |           |           |
|---|-----------|-----------|-----------|
| N | 0.000000  | 0.000000  | 0.000000  |
| C | 0.000000  | 0.000000  | 1.360769  |
| C | 1.444625  | 0.000000  | 1.829989  |
| C | 2.284427  | 0.116783  | 0.545355  |
| C | 1.282690  | 0.036305  | -0.598824 |
| C | -1.095100 | -0.014773 | 2.201183  |
| C | -2.475671 | 0.053209  | 1.861883  |
| C | -3.164839 | 0.345856  | 0.647770  |
| C | -4.528551 | 0.242203  | 0.880456  |
| C | -4.723523 | -0.096592 | 2.255473  |
| N | -3.449607 | -0.168009 | 2.819070  |
| C | -5.925198 | -0.319084 | 2.934715  |
| C | -6.102397 | -0.447169 | 4.361253  |
| C | -7.211280 | -0.978499 | 5.069250  |
| C | -6.944897 | -0.875135 | 6.432530  |
| C | -5.673215 | -0.260514 | 6.594827  |
| N | -5.173496 | -0.053028 | 5.312719  |
| C | -4.903875 | 0.102838  | 7.730048  |
| C | -5.295033 | 0.145918  | 9.064556  |
| N | -4.413850 | 0.414225  | 10.083599 |
| C | -5.054579 | 0.401526  | 11.338245 |
| C | -6.501464 | 0.117464  | 11.033810 |
| C | -6.600563 | -0.027545 | 9.680475  |
| C | -7.611100 | 0.033878  | 12.042120 |
| C | -7.246523 | 0.250931  | 13.513085 |
| O | -4.492254 | 0.590786  | 12.391156 |
| O | 1.464733  | 0.011020  | -1.783353 |
| H | -7.573265 | -1.248021 | 7.236565  |
| H | -2.710350 | 0.662742  | -0.288322 |
| H | -5.332178 | 0.427037  | 0.169457  |
| H | -8.088833 | -1.424579 | 4.604645  |
| H | -7.517818 | -0.205434 | 9.123694  |
| H | -4.430412 | 0.609476  | 5.115691  |
| H | -3.259536 | -0.648645 | 3.692456  |
| H | -6.826931 | -0.413301 | 2.327164  |
| H | 1.618936  | 0.825175  | 2.538239  |
| H | -0.825384 | -0.092609 | -0.585008 |
| H | -0.860496 | -0.089062 | 3.267400  |
| H | 3.033431  | -0.679968 | 0.424908  |
| H | -3.865521 | 0.387342  | 7.526136  |
| H | -3.413825 | 0.556207  | 9.991018  |
| H | -8.390037 | 0.760146  | 11.741243 |
| H | 2.825188  | 1.073678  | 0.466530  |
| H | 1.651380  | -0.933731 | 2.380310  |
| H | -8.152676 | 0.159995  | 14.131103 |
| H | -6.514017 | -0.488658 | 13.867242 |
| H | -6.812612 | 1.246417  | 13.685386 |
| H | -8.094546 | -0.954190 | 11.922343 |

B3LYP/SVP  $S_0$  structure of *ZaZsZa* PΦB

|   |           |           |           |
|---|-----------|-----------|-----------|
| N | 5.331373  | 0.419788  | 0.021789  |
| C | 4.311182  | -0.503665 | 0.005642  |
| C | 4.937211  | -1.817352 | -0.054363 |
| C | 6.294675  | -1.685705 | -0.077370 |
| C | 6.591019  | -0.203641 | -0.057351 |
| C | 2.953830  | -0.274556 | 0.041707  |
| C | 2.281881  | 0.973484  | 0.187737  |
| C | 2.741230  | 2.271251  | 0.554689  |
| C | 1.663364  | 3.141037  | 0.499112  |
| C | 0.507328  | 2.401653  | 0.130787  |
| N | 0.927939  | 1.081202  | -0.022742 |
| C | -0.796450 | 2.885425  | -0.024871 |
| C | -2.000453 | 2.193331  | -0.163133 |
| C | -3.265023 | 2.725484  | -0.536567 |
| C | -4.184685 | 1.690114  | -0.570527 |
| C | -3.517132 | 0.490170  | -0.183681 |
| N | -2.201124 | 0.822452  | 0.016158  |
| C | -3.971803 | -0.851513 | -0.005658 |
| C | -5.265732 | -1.304371 | 0.052553  |
| N | -6.412887 | -0.569528 | 0.023466  |
| C | -7.608493 | -1.321598 | 0.087078  |
| C | -7.191820 | -2.785787 | 0.113281  |
| C | -5.655476 | -2.768208 | 0.186761  |
| O | -8.702469 | -0.833196 | 0.108406  |
| C | 7.291224  | -2.735126 | -0.117413 |
| C | 8.624054  | -2.538318 | -0.137714 |
| O | 7.641856  | 0.385153  | -0.105750 |
| H | -5.219175 | 1.774888  | -0.892874 |
| H | -3.443520 | 3.767519  | -0.797198 |
| H | 3.747278  | 2.523837  | 0.878721  |
| H | 1.666268  | 4.202520  | 0.741664  |
| H | 4.370097  | -2.747725 | -0.056425 |
| H | 0.398540  | 0.372958  | -0.518289 |
| H | -1.559710 | 0.217633  | 0.516285  |
| H | -0.885663 | 3.974389  | -0.038943 |
| H | 2.326107  | -1.163532 | -0.057594 |
| H | 5.237544  | 1.422609  | -0.077822 |
| H | 6.896137  | -3.756759 | -0.131402 |
| H | 9.307990  | -3.389896 | -0.168636 |
| H | 9.053514  | -1.534748 | -0.125521 |
| H | -3.199795 | -1.617302 | 0.106308  |
| H | -5.280056 | -3.157943 | 1.146939  |
| H | -5.176911 | -3.364076 | -0.604850 |
| H | -6.457531 | 0.444286  | 0.034412  |
| H | -7.576360 | -3.271869 | -0.797088 |
| H | -7.676555 | -3.282494 | 0.966207  |

TD-B3LYP/SVP S<sub>1</sub> structure of *ZaZsZa* PΦB

|   |            |           |           |
|---|------------|-----------|-----------|
| C | 0.000000   | 0.000000  | 0.000000  |
| C | 0.000000   | 0.000000  | 1.519443  |
| N | 1.296298   | 0.000000  | 1.937911  |
| C | 2.259790   | -0.041104 | 0.903691  |
| C | 1.480211   | -0.127717 | -0.402076 |
| C | -1.137987  | 0.016685  | 2.298748  |
| C | -1.245602  | -0.046579 | 3.713544  |
| C | -0.298472  | -0.341190 | 4.746421  |
| C | -0.933396  | -0.236240 | 5.968069  |
| C | -2.309451  | 0.106967  | 5.735672  |
| N | -2.452212  | 0.176696  | 4.345798  |
| C | -3.311270  | 0.320330  | 6.667537  |
| C | -4.711787  | 0.505196  | 6.404828  |
| C | -5.689419  | 1.118616  | 7.209295  |
| C | -6.924504  | 1.019997  | 6.541097  |
| C | -6.712484  | 0.338864  | 5.329800  |
| N | -5.349750  | 0.072244  | 5.255318  |
| C | -7.587138  | -0.046344 | 4.261020  |
| C | -8.965300  | -0.091421 | 4.262930  |
| N | -9.828845  | 0.158826  | 5.315186  |
| C | -11.167406 | 0.001753  | 4.936537  |
| C | -11.117063 | -0.351778 | 3.470335  |
| C | -9.786298  | -0.408525 | 3.116022  |
| C | -12.256107 | -0.592359 | 2.625404  |
| C | -13.552384 | -0.529962 | 3.030860  |
| O | -12.120815 | 0.125621  | 5.670866  |
| O | 3.443548   | -0.014574 | 1.093008  |
| H | 0.732050   | -0.656335 | 4.598586  |
| H | -0.502993  | -0.420886 | 6.951060  |
| H | -7.862445  | 1.458730  | 6.874278  |
| H | -5.498594  | 1.608817  | 8.161964  |
| H | -9.383003  | -0.636159 | 2.128872  |
| H | -4.956914  | -0.626906 | 4.633412  |
| H | -3.228984  | 0.647692  | 3.894162  |
| H | -3.003710  | 0.371985  | 7.713779  |
| H | -7.113341  | -0.348976 | 3.322543  |
| H | -9.564999  | 0.295801  | 6.283457  |
| H | -12.033367 | -0.843571 | 1.582094  |
| H | -14.362566 | -0.726783 | 2.323996  |
| H | -13.810165 | -0.285005 | 4.063930  |
| H | -2.078004  | 0.095126  | 1.744323  |
| H | -0.451081  | 0.937990  | -0.366223 |
| H | -0.626194  | -0.819976 | -0.384847 |
| H | 1.599278   | 0.094254  | 2.902591  |
| H | 1.716474   | -1.090401 | -0.883362 |
| H | 1.830415   | 0.661239  | -1.083931 |

B3LYP/SVP S<sub>0</sub> structure of *ZaZsEa* PΦB

|   |           |           |           |
|---|-----------|-----------|-----------|
| N | 4.768826  | -1.949705 | -0.054573 |
| C | 4.275407  | -0.663317 | 0.014024  |
| C | 5.434499  | 0.221085  | 0.005133  |
| C | 6.579795  | -0.518321 | -0.053236 |
| C | 6.169139  | -1.974236 | -0.081891 |
| C | 2.926714  | -0.384061 | 0.050786  |
| C | 2.295686  | 0.886266  | 0.198196  |
| C | 2.781755  | 2.175802  | 0.559155  |
| C | 1.722403  | 3.066204  | 0.501393  |
| C | 0.548887  | 2.349722  | 0.139740  |
| N | 0.943233  | 1.020452  | -0.009062 |
| C | -0.743916 | 2.858790  | -0.015120 |
| C | -1.962726 | 2.191482  | -0.156202 |
| C | -3.213830 | 2.748988  | -0.534612 |
| C | -4.154835 | 1.732063  | -0.572284 |
| C | -3.513830 | 0.519590  | -0.182748 |
| N | -2.191845 | 0.825062  | 0.022697  |
| C | -3.996743 | -0.813247 | -0.006970 |
| C | -5.299762 | -1.237753 | 0.049825  |
| C | -5.723159 | -2.692718 | 0.180769  |
| C | -7.259208 | -2.675001 | 0.100503  |
| C | -7.642431 | -1.201565 | 0.080753  |
| N | -6.430512 | -0.476836 | 0.021762  |
| O | -8.725483 | -0.689003 | 0.102965  |
| C | 7.943229  | -0.034625 | -0.098736 |
| C | 9.039789  | -0.815337 | -0.160167 |
| O | 6.842419  | -2.974515 | -0.122789 |
| H | 3.797075  | 2.406917  | 0.865577  |
| H | -5.185859 | 1.837563  | -0.899611 |
| H | -3.369943 | 3.794233  | -0.796672 |
| H | 1.747951  | 4.128812  | 0.737744  |
| H | 5.380422  | 1.306229  | 0.002989  |
| H | 0.397798  | 0.321865  | -0.500798 |
| H | -1.566330 | 0.208565  | 0.528534  |
| H | -0.811264 | 3.949347  | -0.028096 |
| H | -5.361738 | -3.091390 | 1.142668  |
| H | -7.759188 | -3.165779 | 0.947985  |
| H | -5.254744 | -3.299105 | -0.608838 |
| H | -6.451726 | 0.537669  | 0.036633  |
| H | -3.241253 | -1.595567 | 0.103423  |
| H | -7.650156 | -3.146684 | -0.814744 |
| H | 2.250762  | -1.239647 | -0.046072 |
| H | 4.216854  | -2.799723 | -0.038303 |
| H | 8.056180  | 1.054893  | -0.078573 |
| H | 8.964527  | -1.904244 | -0.181461 |
| H | 10.036047 | -0.367489 | -0.189421 |

TD-B3LYP/SVP S<sub>1</sub> structure of *ZaZsEa* PΦB

|   |           |           |           |
|---|-----------|-----------|-----------|
| N | 0.000000  | 0.000000  | 0.000000  |
| C | 0.000000  | 0.000000  | 1.361787  |
| C | 1.445795  | 0.000000  | 1.829045  |
| C | 2.284334  | 0.114106  | 0.543357  |
| C | 1.280349  | 0.035927  | -0.599493 |
| C | -1.091452 | -0.015418 | 2.205343  |
| C | -2.471754 | 0.047632  | 1.874504  |
| C | -3.167695 | 0.316407  | 0.653546  |
| C | -4.525817 | 0.218270  | 0.890388  |
| C | -4.721337 | -0.093437 | 2.277843  |
| N | -3.441494 | -0.153486 | 2.837074  |
| C | -5.915066 | -0.292215 | 2.956448  |
| C | -6.088552 | -0.435452 | 4.382001  |
| C | -7.162516 | -1.012929 | 5.089038  |
| C | -6.894652 | -0.888857 | 6.461466  |
| C | -5.663479 | -0.220178 | 6.610293  |
| N | -5.175785 | 0.003953  | 5.325848  |
| C | -4.896408 | 0.182420  | 7.748501  |
| C | -5.318064 | 0.316326  | 9.059869  |
| N | -4.460169 | 0.590746  | 10.113941 |
| C | -5.139638 | 0.687482  | 11.329787 |
| C | -6.592310 | 0.476630  | 10.974072 |
| C | -6.650863 | 0.256890  | 9.615243  |
| C | -7.695754 | 0.522373  | 11.897216 |
| C | -7.583671 | 0.745824  | 13.231452 |
| O | -4.626825 | 0.900750  | 12.405116 |
| O | 1.462497  | 0.011339  | -1.784404 |
| H | -7.496337 | -1.295699 | 7.270255  |
| H | -2.715329 | 0.609099  | -0.291271 |
| H | -5.331397 | 0.387881  | 0.177750  |
| H | -8.019126 | -1.504006 | 4.631201  |
| H | -7.554971 | 0.110197  | 9.028318  |
| H | -4.460508 | 0.694549  | 5.121676  |
| H | -3.248195 | -0.606387 | 3.724123  |
| H | -6.819826 | -0.365052 | 2.350141  |
| H | 1.621197  | 0.827011  | 2.534882  |
| H | -0.825114 | -0.089145 | -0.585138 |
| H | -0.851809 | -0.087101 | 3.270477  |
| H | 3.030387  | -0.685251 | 0.422085  |
| H | -3.842084 | 0.410570  | 7.553519  |
| H | -3.450220 | 0.659168  | 10.056673 |
| H | -8.688725 | 0.359424  | 11.462813 |
| H | -6.609528 | 0.909734  | 13.697841 |
| H | -8.473939 | 0.765418  | 13.865458 |
| H | 2.827884  | 1.069218  | 0.463333  |
| H | 1.653165  | -0.932569 | 2.380908  |

### B3LYP/SVP S<sub>0</sub> structure of *ZsZsEa* PΦB

|   |           |           |           |
|---|-----------|-----------|-----------|
| N | 2.653553  | 1.840542  | -0.219088 |
| C | 3.998164  | 1.939072  | 0.077288  |
| C | 4.277942  | 3.398622  | 0.388469  |
| C | 2.884181  | 4.057915  | 0.481825  |
| C | 1.909738  | 3.010383  | -0.040895 |
| C | 4.880949  | 0.897341  | 0.078025  |
| C | 4.547606  | -0.487297 | -0.108046 |
| C | 5.394394  | -1.576552 | -0.420288 |
| C | 4.625052  | -2.738219 | -0.417949 |
| C | 3.285849  | -2.387453 | -0.118049 |
| N | 3.270419  | -0.993538 | 0.033615  |
| C | 2.155684  | -3.208152 | 0.004605  |
| C | 0.820277  | -2.814436 | 0.107942  |
| C | -0.317597 | -3.587262 | 0.479873  |
| C | -1.426758 | -2.758728 | 0.500413  |
| C | -1.012840 | -1.449371 | 0.106634  |
| N | 0.344715  | -1.517141 | -0.087495 |
| C | -1.683729 | -0.208013 | -0.078225 |
| C | -3.039411 | 0.045377  | -0.069353 |
| N | -3.549229 | 1.318515  | -0.194570 |
| C | -4.949609 | 1.326895  | -0.155548 |
| C | -5.339795 | -0.129359 | -0.009003 |
| C | -4.183017 | -0.851401 | 0.039963  |
| C | -6.696877 | -0.627647 | 0.051197  |
| C | -7.805114 | 0.137213  | -0.005199 |
| O | -5.638877 | 2.313525  | -0.230761 |
| O | 0.725993  | 3.088642  | -0.260075 |
| H | -2.430776 | -3.043765 | 0.799260  |
| H | 6.457589  | -1.495261 | -0.637045 |
| H | 4.965614  | -3.747249 | -0.645368 |
| H | -0.286417 | -4.641134 | 0.752346  |
| H | -4.113320 | -1.933150 | 0.115706  |
| H | 0.843319  | -0.819314 | -0.624356 |
| H | 2.593401  | -0.542701 | 0.642008  |
| H | 2.343498  | -4.283940 | 0.034656  |
| H | 4.876726  | 3.834696  | -0.428844 |
| H | 2.780902  | 4.979450  | -0.108801 |
| H | 4.873067  | 3.501599  | 1.307005  |
| H | 2.247364  | 1.045085  | -0.697490 |
| H | 5.937226  | 1.127487  | 0.227306  |
| H | 2.599538  | 4.311607  | 1.515934  |
| H | -1.034143 | 0.659803  | -0.237887 |
| H | -3.001685 | 2.169394  | -0.272070 |
| H | -6.794917 | -1.714218 | 0.151027  |
| H | -7.744878 | 1.222757  | -0.104433 |
| H | -8.795787 | -0.320677 | 0.048434  |



TD-B3LYP/SVP S<sub>1</sub> structure of *ZsZsEa* PΦB

|   |           |           |           |
|---|-----------|-----------|-----------|
| C | 0.000000  | 0.000000  | 0.000000  |
| C | 0.000000  | 0.000000  | 1.445360  |
| N | 1.322547  | 0.000000  | 1.852582  |
| C | 2.197214  | 0.028032  | 0.765750  |
| C | 1.298434  | 0.009133  | -0.453177 |
| C | -1.041189 | -0.019980 | 2.355707  |
| C | -2.448791 | 0.112101  | 2.151151  |
| C | -3.283806 | 0.495758  | 1.080932  |
| C | -4.610059 | 0.528310  | 1.546788  |
| C | -4.604479 | 0.179592  | 2.914952  |
| N | -3.280069 | -0.051764 | 3.253133  |
| C | -5.663308 | 0.128802  | 3.880602  |
| C | -5.479021 | 0.268541  | 5.251501  |
| C | -6.399777 | 0.134093  | 6.342417  |
| C | -5.728747 | 0.426165  | 7.519939  |
| C | -4.376609 | 0.746222  | 7.204679  |
| N | -4.240678 | 0.607519  | 5.829744  |
| C | -3.306917 | 1.117602  | 8.065981  |
| C | -1.967606 | 1.140872  | 7.734887  |
| N | -1.440999 | 0.679991  | 6.551250  |
| C | -0.068003 | 0.855539  | 6.386626  |
| C | 0.424338  | 1.562535  | 7.641772  |
| C | -0.806608 | 1.637916  | 8.575694  |
| O | 0.536403  | 0.498715  | 5.399045  |
| O | 3.404388  | 0.061594  | 0.835183  |
| C | 1.746143  | -0.006513 | -1.822652 |
| C | 3.043119  | 0.000030  | -2.215736 |
| H | -2.951367 | 0.783984  | 0.086597  |
| H | -6.135836 | 0.391176  | 8.529485  |
| H | -7.439056 | -0.174783 | 6.240795  |
| H | -5.490882 | 0.826211  | 0.980692  |
| H | -0.895776 | -0.039508 | -0.616801 |
| H | -3.025796 | -0.639883 | 4.039442  |
| H | -3.605079 | 1.202240  | 5.304144  |
| H | -6.683780 | 0.016970  | 3.509866  |
| H | -0.688389 | 0.990576  | 9.461906  |
| H | 1.273644  | 1.005209  | 8.064548  |
| H | -1.000615 | 2.652979  | 8.954976  |
| H | -1.979497 | 0.155814  | 5.871812  |
| H | -3.574362 | 1.399854  | 9.086553  |
| H | 0.810763  | 2.554966  | 7.356913  |
| H | -0.726048 | -0.100817 | 3.402919  |
| H | 1.633277  | 0.058577  | 2.818858  |
| H | 0.955481  | -0.024144 | -2.581393 |
| H | 3.856199  | 0.017065  | -1.486648 |
| H | 3.298721  | -0.011958 | -3.278511 |

B3LYP/SVP S<sub>0</sub> structure of *ZaEaZs* PΦB

|   |           |           |           |
|---|-----------|-----------|-----------|
| C | -6.657347 | 0.705953  | -0.390454 |
| C | -5.240563 | 0.736776  | -0.076362 |
| N | -4.879427 | -0.557475 | 0.278338  |
| C | -6.009137 | -1.406318 | 0.288186  |
| C | -7.147513 | -0.557307 | -0.217149 |
| C | -4.413602 | 1.831628  | -0.147581 |
| C | -2.993112 | 1.856459  | -0.011182 |
| C | -2.158690 | 2.993443  | 0.187023  |
| C | -0.844009 | 2.562572  | 0.231969  |
| C | -0.828865 | 1.150431  | 0.048903  |
| N | -2.166386 | 0.769911  | -0.077452 |
| C | 0.196708  | 0.198026  | -0.018842 |
| C | 1.580334  | 0.357238  | 0.076606  |
| C | 2.423222  | 1.486431  | 0.296398  |
| C | 3.736468  | 1.056844  | 0.304782  |
| C | 3.748654  | -0.358766 | 0.086265  |
| N | 2.445455  | -0.732400 | -0.037681 |
| C | 4.805608  | -1.316883 | 0.023349  |
| C | 6.156395  | -1.090841 | -0.048399 |
| C | 7.206626  | -2.191019 | -0.050965 |
| C | 8.559271  | -1.458876 | -0.040493 |
| C | 8.216696  | 0.017541  | -0.183392 |
| N | 6.806703  | 0.103688  | -0.146494 |
| O | 8.939148  | 0.966712  | -0.301372 |
| O | -5.989018 | -2.554991 | 0.656377  |
| C | -8.497444 | -1.025259 | -0.454041 |
| C | -8.927793 | -2.286763 | -0.257633 |
| H | 4.600841  | 1.685537  | 0.501143  |
| H | 2.088544  | 2.508283  | 0.450802  |
| H | -2.520532 | 4.013306  | 0.301150  |
| H | 0.027670  | 3.191267  | 0.389714  |
| H | -7.206906 | 1.575057  | -0.751314 |
| H | -2.466542 | -0.147967 | -0.387177 |
| H | 2.146611  | -1.683673 | -0.220110 |
| H | -0.141325 | -0.833835 | -0.171131 |
| H | -4.890221 | 2.795893  | -0.331760 |
| H | -4.091579 | -0.785658 | 0.875450  |
| H | -9.198474 | -0.266926 | -0.819338 |
| H | -9.967845 | -2.553442 | -0.460294 |
| H | -8.259621 | -3.068292 | 0.109149  |
| H | 4.506546  | -2.368375 | 0.028149  |
| H | 7.077410  | -2.813959 | -0.950918 |
| H | 7.065641  | -2.854644 | 0.815192  |
| H | 6.359366  | 1.007153  | -0.259861 |
| H | 9.118113  | -1.595114 | 0.898735  |
| H | 9.235405  | -1.752296 | -0.856519 |

TD-B3LYP/SVP S<sub>1</sub> structure of *ZaEaZs* PΦB

|   |           |           |           |
|---|-----------|-----------|-----------|
| N | -4.879820 | -0.525050 | 0.327886  |
| C | -5.233490 | 0.770527  | -0.046097 |
| C | -6.638968 | 0.750253  | -0.357535 |
| C | -7.139502 | -0.521064 | -0.168923 |
| C | -6.007181 | -1.369215 | 0.342351  |
| C | -4.388633 | 1.859690  | -0.161275 |
| C | -2.966407 | 1.871772  | -0.066780 |
| C | -2.097330 | 2.972741  | 0.080889  |
| C | -0.784479 | 2.493746  | 0.105588  |
| C | -0.830661 | 1.081565  | -0.047264 |
| N | -2.167294 | 0.739897  | -0.125461 |
| C | 0.173899  | 0.076719  | -0.149422 |
| C | 1.548528  | 0.236063  | 0.023659  |
| C | 2.353819  | 1.353374  | 0.429991  |
| C | 3.678414  | 0.951878  | 0.441596  |
| C | 3.739749  | -0.419679 | 0.043769  |
| N | 2.442387  | -0.808839 | -0.181955 |
| C | 4.818420  | -1.337577 | -0.099431 |
| C | 6.170699  | -1.074257 | -0.101236 |
| N | 6.779830  | 0.143190  | -0.052820 |
| C | 8.193504  | 0.105745  | -0.056024 |
| C | 8.581069  | -1.366829 | -0.051608 |
| C | 7.254371  | -2.135948 | -0.182466 |
| O | 8.885794  | 1.084869  | -0.057133 |
| C | -8.488116 | -0.972315 | -0.399089 |
| C | -8.935171 | -2.235343 | -0.184983 |
| O | -5.998849 | -2.519583 | 0.717374  |
| H | 4.516182  | 1.563768  | 0.767950  |
| H | 1.978140  | 2.327955  | 0.727480  |
| H | -2.417114 | 4.008807  | 0.176831  |
| H | 0.114322  | 3.096488  | 0.192331  |
| H | -7.187165 | 1.617171  | -0.727404 |
| H | -2.500222 | -0.173439 | -0.414180 |
| H | 2.177142  | -1.727415 | -0.518501 |
| H | -0.176809 | -0.932429 | -0.389261 |
| H | -4.863789 | 2.824545  | -0.352580 |
| H | -4.085134 | -0.750600 | 0.917711  |
| H | -9.185011 | -0.214583 | -0.774935 |
| H | -9.978483 | -2.493460 | -0.384300 |
| H | -8.270276 | -3.016120 | 0.190925  |
| H | 4.548362  | -2.389814 | -0.228312 |
| H | 7.174313  | -2.667916 | -1.145662 |
| H | 7.110894  | -2.891599 | 0.605405  |
| H | 6.300468  | 1.037659  | -0.092316 |
| H | 9.115180  | -1.581487 | 0.888189  |
| H | 9.292511  | -1.555280 | -0.869127 |

B3LYP/SVP  $S_0$  structure of  $ZsZsZa$  BV +  $Cl^-$

|    |           |           |           |
|----|-----------|-----------|-----------|
| N  | -3.733393 | 2.003032  | -0.190441 |
| C  | -4.903358 | 1.302556  | -0.116317 |
| C  | -6.001762 | 2.277630  | -0.269284 |
| C  | -5.473811 | 3.505527  | -0.426768 |
| C  | -3.985139 | 3.378358  | -0.363845 |
| C  | -5.158353 | -0.046755 | 0.007622  |
| C  | -4.337138 | -1.215903 | 0.022406  |
| C  | -4.874805 | -2.537198 | -0.122013 |
| C  | -3.819499 | -3.417848 | -0.135868 |
| C  | -2.610447 | -2.662307 | 0.005220  |
| N  | -2.982563 | -1.325171 | 0.105517  |
| C  | -1.341724 | -3.246800 | -0.029876 |
| C  | -0.024278 | -2.763450 | -0.006632 |
| C  | 1.149610  | -3.570880 | -0.121471 |
| C  | 2.251207  | -2.735399 | -0.070902 |
| C  | 1.765228  | -1.398976 | 0.081921  |
| N  | 0.407688  | -1.461992 | 0.108377  |
| C  | 2.421415  | -0.135892 | 0.241632  |
| C  | 3.750388  | 0.155072  | 0.086108  |
| C  | 4.359082  | 1.452996  | 0.335119  |
| C  | 5.699037  | 1.395709  | 0.085037  |
| C  | 6.002924  | -0.005246 | -0.376597 |
| N  | 4.778765  | -0.680023 | -0.320550 |
| O  | 7.048634  | -0.501177 | -0.737879 |
| C  | 6.673582  | 2.462234  | 0.220790  |
| C  | 7.989870  | 2.356225  | -0.038966 |
| O  | -3.145924 | 4.244527  | -0.441855 |
| H  | -5.934129 | -2.762295 | -0.228127 |
| H  | -3.856514 | -4.499437 | -0.255692 |
| H  | 3.292516  | -3.046414 | -0.091425 |
| H  | 1.148983  | -4.654901 | -0.224137 |
| H  | 3.791042  | 2.314199  | 0.686497  |
| Cl | -1.175913 | 0.952797  | 1.038367  |
| H  | -1.387577 | -4.335066 | -0.125087 |
| H  | 1.770314  | 0.697609  | 0.519623  |
| H  | 4.677593  | -1.618122 | -0.683891 |
| H  | 6.268513  | 3.420583  | 0.565810  |
| H  | 8.651492  | 3.216208  | 0.091803  |
| H  | 8.424078  | 1.416402  | -0.385198 |
| H  | -6.223232 | -0.289805 | 0.011511  |
| H  | -7.052540 | 1.988228  | -0.267606 |
| H  | -5.978405 | 4.457868  | -0.578715 |
| H  | -0.181005 | -0.618056 | 0.301767  |
| H  | -2.347108 | -0.540416 | 0.407006  |
| H  | -2.780854 | 1.660228  | 0.077272  |

TD-B3LYP/SVP S<sub>1</sub> structure of ZsZsZa BV + Cl<sup>-</sup>

|    |           |           |           |
|----|-----------|-----------|-----------|
| N  | 0.000000  | 0.000000  | 0.000000  |
| C  | 0.000000  | 0.000000  | 1.383490  |
| C  | 1.380610  | 0.000000  | 1.798008  |
| C  | 2.198472  | -0.006911 | 0.692458  |
| C  | 1.303529  | -0.026664 | -0.514652 |
| C  | -1.086897 | 0.006123  | 2.242628  |
| C  | -2.471551 | 0.059834  | 1.939796  |
| C  | -3.223084 | 0.170774  | 0.730501  |
| C  | -4.567786 | 0.141739  | 1.070403  |
| C  | -4.660173 | 0.029192  | 2.494568  |
| N  | -3.383621 | -0.006575 | 2.970313  |
| C  | -5.867079 | 0.002597  | 3.249561  |
| C  | -6.135102 | 0.085621  | 4.615808  |
| C  | -7.472285 | 0.180774  | 5.156255  |
| C  | -7.371451 | 0.330767  | 6.514113  |
| C  | -5.971511 | 0.341454  | 6.858489  |
| N  | -5.260778 | 0.178207  | 5.692910  |
| C  | -5.506197 | 0.574188  | 8.170666  |
| C  | -4.251480 | 0.857516  | 8.715939  |
| N  | -3.022056 | 0.905382  | 8.134694  |
| C  | -2.038838 | 1.296316  | 9.079628  |
| C  | -2.781850 | 1.527692  | 10.347119 |
| C  | -4.088323 | 1.253839  | 10.119627 |
| O  | -0.855799 | 1.404230  | 8.844865  |
| C  | 3.643242  | -0.002639 | 0.664527  |
| C  | 4.408973  | -0.015792 | -0.448263 |
| O  | 1.576505  | -0.062933 | -1.697173 |
| Cl | -2.370662 | -0.797601 | 5.723763  |
| H  | -8.179224 | 0.460934  | 7.232583  |
| H  | -8.377702 | 0.164527  | 4.551409  |
| H  | -2.824638 | 0.281537  | -0.275364 |
| H  | -5.419735 | 0.217725  | 0.396678  |
| H  | 1.688304  | 0.014233  | 2.843787  |
| H  | -6.766529 | -0.027852 | 2.630134  |
| H  | -0.847017 | -0.054576 | 3.309327  |
| H  | -0.807782 | -0.092667 | -0.601318 |
| H  | 4.128766  | 0.011643  | 1.647753  |
| H  | 5.499409  | -0.011852 | -0.370417 |
| H  | 3.959904  | -0.031512 | -1.443651 |
| H  | -6.315862 | 0.629090  | 8.902343  |
| H  | -4.922589 | 1.323780  | 10.818051 |
| H  | -2.299154 | 1.861940  | 11.263891 |
| H  | -3.079839 | -0.200989 | 3.951354  |
| H  | -4.250753 | -0.116761 | 5.678923  |
| H  | -2.745514 | 0.477038  | 7.218682  |

B3LYP/SVP  $S_0$  structure of  $ZsZsZa$  PCB +  $Cl^-$

|    |           |           |           |
|----|-----------|-----------|-----------|
| N  | 4.809316  | -0.810247 | 0.023804  |
| C  | 3.743817  | 0.070284  | 0.116977  |
| C  | 4.334466  | 1.401595  | 0.261967  |
| C  | 5.686507  | 1.308926  | 0.257697  |
| C  | 6.034791  | -0.142317 | 0.122444  |
| C  | 2.403230  | -0.193057 | 0.080399  |
| C  | 1.742298  | -1.454055 | -0.099023 |
| C  | 2.211807  | -2.769050 | -0.392794 |
| C  | 1.105532  | -3.603520 | -0.433748 |
| C  | -0.053574 | -2.812511 | -0.180698 |
| N  | 0.387240  | -1.522339 | 0.005891  |
| C  | -1.375940 | -3.294437 | -0.168813 |
| C  | -2.635986 | -2.712402 | -0.054248 |
| C  | -3.857038 | -3.455566 | -0.166724 |
| C  | -4.904507 | -2.572039 | -0.076135 |
| C  | -4.353613 | -1.255584 | 0.087238  |
| N  | -2.999861 | -1.374882 | 0.107966  |
| C  | -5.169272 | -0.082375 | 0.144160  |
| C  | -4.918299 | 1.263756  | 0.020099  |
| N  | -3.741825 | 1.936786  | -0.109593 |
| C  | -3.891922 | 3.306897  | -0.368351 |
| C  | -5.390832 | 3.581691  | -0.484717 |
| C  | -6.054834 | 2.280170  | -0.023417 |
| O  | -2.986927 | 4.089837  | -0.492761 |
| C  | 6.736844  | 2.368325  | 0.357663  |
| C  | 7.528796  | 2.562772  | -0.946420 |
| O  | 7.126997  | -0.671150 | 0.106455  |
| Cl | -1.166555 | 0.868595  | 1.063676  |
| H  | -5.968805 | -2.788584 | -0.143211 |
| H  | -3.906253 | -4.532293 | -0.321770 |
| H  | 3.239932  | -3.063618 | -0.586215 |
| H  | 1.094694  | -4.672451 | -0.640916 |
| H  | 3.730198  | 2.304767  | 0.349220  |
| H  | -1.428170 | -4.376879 | -0.314723 |
| H  | 1.739959  | 0.664280  | 0.223090  |
| H  | 4.752750  | -1.819290 | 0.016295  |
| H  | 6.268130  | 3.317255  | 0.664495  |
| H  | -6.233399 | -0.324129 | 0.202852  |
| H  | -6.869296 | 1.936851  | -0.677357 |
| H  | -5.612599 | 3.824388  | -1.536860 |
| H  | -0.186779 | -0.697351 | 0.296961  |
| H  | -2.351231 | -0.604225 | 0.409961  |
| H  | -2.787246 | 1.557546  | 0.115674  |
| H  | -5.650369 | 4.467400  | 0.111886  |
| H  | -6.477353 | 2.379002  | 0.991008  |
| H  | 8.305309  | 3.332999  | -0.816460 |
| H  | 8.023878  | 1.626027  | -1.243059 |
| H  | 6.868798  | 2.880145  | -1.769400 |
| H  | 7.441010  | 2.082303  | 1.158679  |

TD-B3LYP/SVP S<sub>1</sub> structure of ZsZsZa PCB + Cl<sup>-</sup>

|    |           |           |           |
|----|-----------|-----------|-----------|
| C  | 0.000000  | 0.000000  | 0.000000  |
| C  | 0.000000  | 0.000000  | 1.523351  |
| N  | 1.292860  | 0.000000  | 1.950949  |
| C  | 2.236889  | -0.124565 | 0.919288  |
| C  | 1.457031  | -0.287254 | -0.385038 |
| C  | -1.176298 | -0.025897 | 2.250374  |
| C  | -1.502124 | -0.135068 | 3.636843  |
| C  | -2.813478 | -0.443905 | 4.105147  |
| C  | -2.754009 | -0.565893 | 5.482219  |
| C  | -1.402338 | -0.321997 | 5.886654  |
| N  | -0.676273 | -0.058836 | 4.735871  |
| C  | -0.961892 | -0.412900 | 7.228175  |
| C  | 0.301353  | -0.328235 | 7.837377  |
| C  | 0.584534  | -0.622417 | 9.218444  |
| C  | 1.939607  | -0.459620 | 9.423919  |
| C  | 2.521518  | -0.042108 | 8.178360  |
| N  | 1.501629  | 0.004051  | 7.260263  |
| C  | 3.841773  | 0.288206  | 7.786162  |
| C  | 4.978887  | 0.403746  | 8.569396  |
| N  | 5.087909  | 0.306043  | 9.941006  |
| C  | 6.416425  | 0.506595  | 10.362054 |
| C  | 7.198556  | 0.715138  | 9.108542  |
| C  | 6.318769  | 0.658552  | 8.067012  |
| C  | 8.677103  | 0.933001  | 9.118341  |
| C  | 9.476493  | -0.313716 | 9.540182  |
| O  | 6.785701  | 0.508189  | 11.520400 |
| O  | 3.431122  | -0.123159 | 1.074533  |
| Cl | 2.051249  | 1.295426  | 4.566675  |
| H  | -3.680568 | -0.590598 | 3.463098  |
| H  | -3.563613 | -0.821510 | 6.164006  |
| H  | 2.473796  | -0.652262 | 10.351366 |
| H  | -0.158186 | -0.948431 | 9.945151  |
| H  | 6.538361  | 0.771517  | 7.004878  |
| H  | -1.766904 | -0.658283 | 7.924946  |
| H  | 3.976010  | 0.491313  | 6.719122  |
| H  | 4.323565  | 0.246535  | 10.600829 |
| H  | 9.001153  | 1.272890  | 8.120875  |
| H  | -2.069442 | -0.042061 | 1.619400  |
| H  | -0.719608 | -0.730597 | -0.399343 |
| H  | 1.607706  | -1.317462 | -0.748934 |
| H  | 1.654478  | 0.375728  | 6.297791  |
| H  | 0.275867  | 0.384852  | 4.704556  |
| H  | 1.619926  | 0.243235  | 2.921419  |
| H  | 1.872011  | 0.386568  | -1.148545 |
| H  | -0.323665 | 0.993943  | -0.357137 |
| H  | 10.556027 | -0.093052 | 9.558450  |
| H  | 9.178990  | -0.643892 | 10.547204 |
| H  | 9.310759  | -1.148556 | 8.840431  |
| H  | 8.903628  | 1.750290  | 9.826521  |

B3LYP/SVP  $S_0$  structure of *ZaZsZa* PΦB + Cl<sup>-</sup>

|    |           |           |           |
|----|-----------|-----------|-----------|
| C  | 5.693777  | -2.620590 | -0.091926 |
| C  | 5.295936  | -1.154953 | -0.007788 |
| N  | 6.446613  | -0.435628 | 0.241531  |
| C  | 7.625178  | -1.182493 | 0.257229  |
| C  | 7.232255  | -2.616100 | -0.087588 |
| C  | 4.024067  | -0.689010 | -0.136181 |
| C  | 3.561906  | 0.670556  | -0.089675 |
| C  | 4.236420  | 1.937116  | -0.072612 |
| C  | 3.266476  | 2.919608  | -0.050084 |
| C  | 1.985245  | 2.280315  | -0.056251 |
| N  | 2.230956  | 0.919345  | -0.082039 |
| C  | 0.754804  | 2.940361  | -0.047588 |
| C  | -0.573442 | 2.487595  | -0.067622 |
| C  | -1.730568 | 3.327387  | -0.074241 |
| C  | -2.849494 | 2.515277  | -0.104358 |
| C  | -2.390243 | 1.159975  | -0.113302 |
| N  | -1.032488 | 1.188188  | -0.094379 |
| C  | -3.066921 | -0.102441 | -0.162198 |
| C  | -4.407897 | -0.352499 | -0.050720 |
| N  | -5.443516 | 0.538785  | 0.185543  |
| C  | -6.680637 | -0.109322 | 0.252697  |
| C  | -6.376993 | -1.560575 | -0.010116 |
| C  | -5.026246 | -1.664157 | -0.171010 |
| C  | -7.361647 | -2.625102 | -0.068527 |
| C  | -8.688118 | -2.474959 | 0.101848  |
| O  | -7.736725 | 0.439954  | 0.485293  |
| O  | 8.718479  | -0.731691 | 0.489969  |
| H  | 5.309737  | 2.105177  | -0.115790 |
| H  | 3.420154  | 3.997668  | -0.041352 |
| H  | -3.882164 | 2.850358  | -0.157872 |
| H  | -1.706224 | 4.416056  | -0.068652 |
| H  | -4.454420 | -2.569093 | -0.375585 |
| Cl | 0.388110  | -1.511626 | -0.189839 |
| H  | 1.535340  | 0.124289  | -0.102409 |
| H  | 0.843169  | 4.029810  | -0.024422 |
| H  | -2.414018 | -0.971355 | -0.290841 |
| H  | -5.347064 | 1.514809  | 0.430504  |
| H  | -6.954834 | -3.622919 | -0.270038 |
| H  | -9.355948 | -3.337932 | 0.040322  |
| H  | -9.124750 | -1.495333 | 0.305382  |
| H  | 3.234683  | -1.435052 | -0.272143 |
| H  | 5.256655  | -3.092876 | -0.983262 |
| H  | 5.284820  | -3.155167 | 0.781284  |
| H  | 6.472153  | 0.554938  | 0.454784  |
| H  | 7.687492  | -3.304490 | 0.638616  |
| H  | 7.665061  | -2.858283 | -1.071897 |
| H  | -0.475856 | 0.290186  | -0.105975 |



TD-B3LYP/SVP S<sub>1</sub> structure of *ZaZsZa* PΦB + Cl<sup>-</sup>

|    |           |           |           |
|----|-----------|-----------|-----------|
| C  | 4.965002  | -0.166055 | -1.682070 |
| C  | 4.378626  | -0.033914 | -0.372857 |
| N  | 5.420249  | 0.197634  | 0.505893  |
| C  | 6.656578  | 0.246408  | -0.159324 |
| C  | 6.332064  | -0.014853 | -1.599412 |
| C  | 3.020676  | -0.130914 | -0.091858 |
| C  | 2.368730  | -0.081244 | 1.160805  |
| C  | 2.844836  | -0.051075 | 2.520914  |
| C  | 1.744794  | -0.037221 | 3.347023  |
| C  | 0.560653  | -0.056602 | 2.521654  |
| N  | 0.997815  | -0.086829 | 1.217018  |
| C  | -0.755498 | -0.045004 | 3.000941  |
| C  | -2.003885 | -0.071658 | 2.327533  |
| C  | -3.290773 | -0.065105 | 2.953864  |
| C  | -4.254726 | -0.102754 | 1.953141  |
| C  | -3.569470 | -0.129583 | 0.702754  |
| N  | -2.226402 | -0.116551 | 0.974852  |
| C  | -3.991222 | -0.181258 | -0.665733 |
| C  | -5.253982 | -0.039691 | -1.179288 |
| C  | -5.613944 | -0.138423 | -2.651055 |
| C  | -7.151920 | -0.071121 | -2.688079 |
| C  | -7.572586 | 0.281032  | -1.263572 |
| N  | -6.409639 | 0.237851  | -0.487865 |
| O  | -8.669233 | 0.540706  | -0.836031 |
| O  | 7.719628  | 0.466428  | 0.386592  |
| C  | 7.294501  | -0.084019 | -2.674593 |
| C  | 8.630608  | 0.075464  | -2.552520 |
| Cl | -0.420328 | -0.204411 | -1.478746 |
| H  | -5.330346 | -0.151708 | 2.111050  |
| H  | -3.457242 | -0.048845 | 4.030086  |
| H  | 3.883544  | -0.082585 | 2.841122  |
| H  | 1.735214  | -0.021830 | 4.435938  |
| H  | 4.378045  | -0.368576 | -2.577917 |
| H  | -1.528051 | -0.135156 | 0.185046  |
| H  | -0.837435 | -0.013286 | 4.089800  |
| H  | 2.357585  | -0.248980 | -0.955787 |
| H  | 5.339643  | 0.436712  | 1.485225  |
| H  | 6.870042  | -0.284563 | -3.665954 |
| H  | 9.279444  | 0.005895  | -3.429740 |
| H  | 9.089785  | 0.277370  | -1.582453 |
| H  | -3.179668 | -0.325402 | -1.388698 |
| H  | -5.203431 | -1.059106 | -3.092796 |
| H  | -5.151280 | 0.701681  | -3.197262 |
| H  | -6.446956 | 0.456722  | 0.502556  |
| H  | -7.556253 | 0.679794  | -3.382711 |
| H  | -7.618872 | -1.033991 | -2.953834 |
| H  | 0.432987  | -0.110056 | 0.327619  |

PBE0/SVP  $S_0$  structure of  $ZaZsZa$  PΦB

|   |           |           |           |
|---|-----------|-----------|-----------|
| N | 5.294702  | 0.417076  | 0.017690  |
| C | 4.289708  | -0.513196 | 0.016557  |
| C | 4.925370  | -1.817710 | -0.039929 |
| C | 6.276706  | -1.669206 | -0.075145 |
| C | 6.553253  | -0.189384 | -0.069660 |
| C | 2.934998  | -0.297007 | 0.061586  |
| C | 2.264548  | 0.948802  | 0.207648  |
| C | 2.724797  | 2.236276  | 0.591029  |
| C | 1.653497  | 3.108042  | 0.527357  |
| C | 0.505699  | 2.375071  | 0.139883  |
| N | 0.921882  | 1.061897  | -0.018292 |
| C | -0.792192 | 2.860997  | -0.026975 |
| C | -1.990439 | 2.169044  | -0.175409 |
| C | -3.246250 | 2.698227  | -0.565319 |
| C | -4.160624 | 1.663763  | -0.606454 |
| C | -3.495015 | 0.472338  | -0.205220 |
| N | -2.189862 | 0.806309  | 0.007663  |
| C | -3.950497 | -0.865045 | -0.026892 |
| C | -5.245838 | -1.302054 | 0.042304  |
| N | -6.377114 | -0.553904 | 0.031956  |
| C | -7.574759 | -1.287477 | 0.105401  |
| C | -7.178642 | -2.748518 | 0.112681  |
| C | -5.651425 | -2.752586 | 0.172183  |
| O | -8.659250 | -0.787792 | 0.146250  |
| C | 7.285114  | -2.701819 | -0.115132 |
| C | 8.610410  | -2.478745 | -0.146907 |
| O | 7.593992  | 0.407724  | -0.133887 |
| H | -5.189714 | 1.742994  | -0.948089 |
| H | -3.421896 | 3.738677  | -0.834430 |
| H | 3.726451  | 2.480494  | 0.935620  |
| H | 1.655134  | 4.167385  | 0.779424  |
| H | 4.368858  | -2.754390 | -0.029541 |
| H | 0.397293  | 0.360307  | -0.526060 |
| H | -1.554328 | 0.206242  | 0.518676  |
| H | -0.880821 | 3.949977  | -0.041452 |
| H | 2.312173  | -1.189819 | -0.030730 |
| H | 5.186807  | 1.416105  | -0.093662 |
| H | 6.907993  | -3.729947 | -0.118616 |
| H | 9.310967  | -3.316422 | -0.176919 |
| H | 9.017396  | -1.465294 | -0.145226 |
| H | -3.184311 | -1.637303 | 0.076638  |
| H | -5.271960 | -3.149928 | 1.127093  |
| H | -5.185903 | -3.350635 | -0.624793 |
| H | -6.405670 | 0.459153  | 0.055118  |
| H | -7.579037 | -3.217879 | -0.799024 |
| H | -7.665137 | -3.247683 | 0.962422  |

TD-PBE0/SVP S<sub>1</sub> structure of *ZaZsZa PΦB*

|   |           |           |           |
|---|-----------|-----------|-----------|
| C | 4.737546  | -1.797422 | -0.220920 |
| C | 4.176398  | -0.482281 | -0.064217 |
| N | 5.224314  | 0.387982  | 0.109084  |
| C | 6.452389  | -0.272853 | 0.051193  |
| C | 6.105729  | -1.721921 | -0.144432 |
| C | 2.826392  | -0.189656 | -0.084835 |
| C | 2.198763  | 1.063515  | 0.144837  |
| C | 2.658448  | 2.279631  | 0.689631  |
| C | 1.601815  | 3.190613  | 0.672274  |
| C | 0.476996  | 2.539788  | 0.126622  |
| N | 0.860536  | 1.246006  | -0.149774 |
| C | -0.825344 | 3.058302  | -0.120651 |
| C | -1.994122 | 2.321200  | -0.253367 |
| C | -3.286244 | 2.769898  | -0.663717 |
| C | -4.146725 | 1.691604  | -0.632660 |
| C | -3.421634 | 0.550841  | -0.182049 |
| N | -2.123468 | 0.961468  | -0.005058 |
| C | -3.798371 | -0.794350 | 0.057576  |
| C | -5.064891 | -1.328769 | 0.115331  |
| C | -5.365009 | -2.795906 | 0.307488  |
| C | -6.886033 | -2.908623 | 0.203555  |
| C | -7.388071 | -1.483612 | 0.108181  |
| N | -6.244623 | -0.667194 | 0.036134  |
| O | -8.507241 | -1.064581 | 0.086843  |
| O | 7.529027  | 0.260873  | 0.135953  |
| C | 7.050178  | -2.799164 | -0.239316 |
| C | 8.392998  | -2.655223 | -0.161759 |
| H | -5.182837 | 1.705887  | -0.963572 |
| H | -3.513811 | 3.784760  | -0.985112 |
| H | 3.640887  | 2.457475  | 1.121379  |
| H | 1.611275  | 4.212281  | 1.046511  |
| H | 4.139217  | -2.697935 | -0.358439 |
| H | 0.351346  | 0.645408  | -0.788029 |
| H | -1.450283 | 0.434678  | 0.539310  |
| H | -0.919176 | 4.143952  | -0.179600 |
| H | 2.173200  | -1.034453 | -0.319945 |
| H | 5.166956  | 1.397545  | 0.120311  |
| H | 6.623460  | -3.797392 | -0.385622 |
| H | 9.047742  | -3.526018 | -0.244156 |
| H | 8.848947  | -1.672788 | -0.017675 |
| H | -2.985550 | -1.506564 | 0.225088  |
| H | -4.988739 | -3.118553 | 1.292442  |
| H | -4.831201 | -3.398811 | -0.442527 |
| H | -6.346740 | 0.341266  | 0.001741  |
| H | -7.221164 | -3.452333 | -0.693371 |
| H | -7.362370 | -3.400250 | 1.063598  |

### B3LYP/TZVP $S_0$ structure of *ZaZsZa* PΦB

|   |           |           |           |
|---|-----------|-----------|-----------|
| N | 5.319574  | 0.430849  | 0.037333  |
| C | 4.307110  | -0.501272 | 0.023059  |
| C | 4.943726  | -1.804030 | -0.034418 |
| C | 6.292061  | -1.665750 | -0.075335 |
| C | 6.580679  | -0.186009 | -0.071748 |
| C | 2.957048  | -0.284473 | 0.066028  |
| C | 2.281340  | 0.954758  | 0.211328  |
| C | 2.724490  | 2.246043  | 0.589572  |
| C | 1.648064  | 3.107314  | 0.525984  |
| C | 0.503762  | 2.372988  | 0.141136  |
| N | 0.927659  | 1.052500  | -0.007909 |
| C | -0.791554 | 2.853697  | -0.025467 |
| C | -1.988176 | 2.167423  | -0.175177 |
| C | -3.240122 | 2.697813  | -0.564447 |
| C | -4.160627 | 1.671959  | -0.607603 |
| C | -3.511103 | 0.474584  | -0.210836 |
| N | -2.193535 | 0.795637  | -0.001866 |
| C | -3.972586 | -0.858694 | -0.034964 |
| C | -5.261800 | -1.295655 | 0.036566  |
| N | -6.400969 | -0.549793 | 0.026506  |
| C | -7.600636 | -1.289489 | 0.107964  |
| C | -7.201974 | -2.755176 | 0.118518  |
| C | -5.664919 | -2.754125 | 0.168248  |
| O | -8.688756 | -0.789720 | 0.151472  |
| C | 7.286183  | -2.710528 | -0.116804 |
| C | 8.611403  | -2.519605 | -0.145612 |
| O | 7.624805  | 0.408738  | -0.151647 |
| H | -5.178293 | 1.760827  | -0.947562 |
| H | -3.410049 | 3.729175  | -0.830923 |
| H | 3.714009  | 2.499485  | 0.929243  |
| H | 1.645424  | 4.156821  | 0.775146  |
| H | 4.388909  | -2.730207 | -0.022174 |
| H | 0.421796  | 0.361571  | -0.540069 |
| H | -1.579586 | 0.204294  | 0.536356  |
| H | -0.879223 | 3.933533  | -0.038948 |
| H | 2.339086  | -1.169661 | -0.027828 |
| H | 5.216197  | 1.421257  | -0.110553 |
| H | 6.893727  | -3.722915 | -0.123344 |
| H | 9.284281  | -3.366529 | -0.176256 |
| H | 9.048133  | -1.530550 | -0.140980 |
| H | -3.212010 | -1.624834 | 0.061759  |
| H | -5.287835 | -3.150419 | 1.113152  |
| H | -5.215120 | -3.344532 | -0.630135 |
| H | -6.434657 | 0.458557  | 0.051925  |
| H | -7.597107 | -3.226293 | -0.782613 |
| H | -7.669387 | -3.246726 | 0.970784  |

TD-B3LYP/TZVP S<sub>1</sub> structure of *ZaZsZa* PΦB

|   |           |           |           |
|---|-----------|-----------|-----------|
| C | 4.797959  | -1.784606 | -0.212774 |
| C | 4.217738  | -0.477634 | -0.052824 |
| N | 5.268379  | 0.405051  | 0.126038  |
| C | 6.504934  | -0.246189 | 0.050463  |
| C | 6.164735  | -1.698894 | -0.146156 |
| C | 2.874963  | -0.203637 | -0.066300 |
| C | 2.228988  | 1.047601  | 0.165743  |
| C | 2.655194  | 2.252569  | 0.728693  |
| C | 1.577733  | 3.151845  | 0.708828  |
| C | 0.481031  | 2.500848  | 0.138621  |
| N | 0.881081  | 1.207542  | -0.144657 |
| C | -0.827826 | 3.014172  | -0.143189 |
| C | -1.987766 | 2.289979  | -0.274145 |
| C | -3.278088 | 2.744249  | -0.697797 |
| C | -4.149065 | 1.683647  | -0.660453 |
| C | -3.449539 | 0.532366  | -0.193044 |
| N | -2.135704 | 0.920562  | -0.019179 |
| C | -3.848829 | -0.800868 | 0.051602  |
| C | -5.117869 | -1.315870 | 0.114098  |
| C | -5.438702 | -2.785787 | 0.312217  |
| C | -6.971772 | -2.879907 | 0.213490  |
| C | -7.453739 | -1.442290 | 0.114227  |
| N | -6.295375 | -0.638452 | 0.034715  |
| O | -8.570315 | -1.005512 | 0.095497  |
| O | 7.583701  | 0.294572  | 0.124446  |
| C | 7.104147  | -2.775236 | -0.252990 |
| C | 8.448048  | -2.645933 | -0.185972 |
| H | -5.172923 | 1.709128  | -0.995447 |
| H | -3.490023 | 3.747504  | -1.032540 |
| H | 3.618063  | 2.441318  | 1.173870  |
| H | 1.571472  | 4.159862  | 1.090845  |
| H | 4.214080  | -2.683777 | -0.346406 |
| H | 0.402700  | 0.622348  | -0.813659 |
| H | -1.493617 | 0.406112  | 0.565178  |
| H | -0.908736 | 4.088117  | -0.248990 |
| H | 2.232584  | -1.049847 | -0.285560 |
| H | 5.203886  | 1.410232  | 0.122991  |
| H | 6.676078  | -3.762682 | -0.400479 |
| H | 9.085197  | -3.516182 | -0.277643 |
| H | 8.918739  | -1.682503 | -0.041983 |
| H | -3.051447 | -1.517125 | 0.219748  |
| H | -5.073122 | -3.110535 | 1.289762  |
| H | -4.928119 | -3.392556 | -0.437010 |
| H | -6.386957 | 0.366827  | 0.004791  |
| H | -7.307668 | -3.418563 | -0.674440 |
| H | -7.439596 | -3.355631 | 1.074990  |
